# Supplementary material
Source: publisher figshare collection journal article supplement (https://sage.figshare.com/ndownloader/files/14625548)
Supplement: Supplementary file 1 [file 14625548]

**Wellbeing Score – Strand B**

| Patient No. | Session 1<br>Baseline<br>During | Session 2<br>Baseline<br>During | Session 3<br>Baseline<br>During | Session 4<br>Baseline<br>During | Session 5<br>Baseline<br>During | Session 6<br>Baseline<br>During | Session 7<br>Baseline<br>During | Session 8<br>Baseline<br>During | Session 9<br>Baseline<br>During | Session 10<br>Baseline<br>During | Session 11<br>Baseline<br>During | Session 12<br>Baseline<br>During | Notes |
|-------------|---------------------------------|---------------------------------|---------------------------------|---------------------------------|---------------------------------|---------------------------------|---------------------------------|---------------------------------|---------------------------------|----------------------------------|----------------------------------|----------------------------------|-------|
| 1           | Alert<br>+5                     | Agitated<br>+4                  | Alert<br>+5                     | Anxious<br>+3                   | Alert<br>+5                     | Alert<br>+5                     | Agitated<br>+5                  | Agitated<br>+5                  | Passive<br>+5                   | Passive<br>+3                    | Alert<br>+5                      | Agitated<br>+5                   |       |
| 2           | Active<br>+4                    | Talking<br>+3/4                 | Alert<br>+4                     | Alert<br>+5                     | Agitated<br>+5                  | Anxious<br>+4                   | Asleep<br>+4                    | Anxious<br>+3                   | Anxious<br>+3/4                 | Alert<br>+5                      | Settled<br>+4                    | Alert<br>+5                      |       |
| 3           | Passive<br>+3                   | Alert<br>+4                     | Active<br>/Talking<br>+5        | Active<br>/Talking<br>+5        | Active<br>/Talking<br>+5        | Active<br>/Talking<br>+5        | Active<br>/Talking<br>+5        | Active<br>/Talking<br>+4        | Active<br>/Talking<br>+5        | Active<br>/Talking<br>+5         | Active<br>/Talking<br>+5         | Active<br>/Talking<br>+5         |       |
| 4           | Anxious<br>+3/4                 | Agitated<br>+5                  | Bright<br>+5                    | Active<br>+5                    | Relaxed<br>+3                   | Anxious<br>+5                   | Alert<br>+5                     | Relaxed<br>+4                   | Wary<br>+3                      | Active<br>+3                     | Passive<br>+3                    | Relaxed<br>+5                    |       |
| 5           | Alert<br>+3                     | Active<br>+4                    | Passive<br>+4                   | Low<br>+4                       | Anxious<br>+3                   | Anxious<br>+3                   | Low<br>+4/5                     | Anxious<br>+4                   | Very Low<br>+3                  | Passive<br>+4                    | Relaxed<br>+5                    | Anxious<br>+3                    |       |
| 6           | Passive<br>+2                   | Alert<br>+3                     | Agitated<br>-1                  | Alert<br>+2                     | Passive<br>1                    | Talking<br>+3                   | Alert<br>+4                     | Passive<br>+1                   | Alert<br>+3                     | Alert<br>+4                      | Passive<br>+2                    | Alert<br>+4                      |       |
| 7           | Passive<br>+2                   | Alert<br>+3                     | Alert<br>+3                     | Alert<br>+4                     | Passive<br>+2                   | Alert<br>+3                     | Alert<br>+3                     | Passive<br>+1                   | Passive<br>+2                   | Passive<br>+2                    | Alert<br>+3                      | Alert<br>+3                      |       |
| 8           |                                 |                                 |                                 |                                 |                                 |                                 |                                 |                                 |                                 |                                  |                                  |                                  |       |

**Relationship Score – Strand B**

| Patient | Session 1 | Session 2 | Session 3 | Session 4 | Session 5 | Session 6 | Session 7 | Session 8 | Session 9 | Session | Session | Session | Notes |
|---------|-----------|-----------|-----------|-----------|-----------|-----------|-----------|-----------|-----------|---------|---------|---------|-------|
|---------|-----------|-----------|-----------|-----------|-----------|-----------|-----------|-----------|-----------|---------|---------|---------|-------|

| No. | Baseline During  | Baseline During   | Baseline During            | Baseline During            | Baseline During            | Baseline During            | Baseline During            | Baseline During            | Baseline During            | Baseline During            | 10<br>Baseline During      | 11<br>Baseline During      | 12<br>Baseline During      |  |
|-----|------------------|-------------------|----------------------------|----------------------------|----------------------------|----------------------------|----------------------------|----------------------------|----------------------------|----------------------------|----------------------------|----------------------------|----------------------------|--|
| 1   | Alert<br>+5      | Agitated<br>+4    | Alert<br>+5                | Anxious<br>+3              | Alert<br>+5                | Alert<br>+5                | Agitated<br>+5             | Agitated<br>+4             | Passive<br>+4              | Passive<br>+4              | Passive<br>+4              | Alert<br>+5                | Agitated<br>+4             |  |
| 2   | Active<br>+4R    | Talking<br>+4RT   | Alert<br>+4RT              | Alert<br>+5RT              | Agitated<br>+5RT           | Anxious<br>+5              | Asleep<br>+4               | Anxious<br>+4              | Anxious<br>+5RT            | Alert<br>+5RT              | Alert<br>+5RT              | Settled<br>+5RT            | Alert<br>+5RT              |  |
| 3   | Passive<br>+3RT  | Alert<br>+4RT     | Active<br>/Talking<br>+5RT | Active<br>/Talking<br>+5RT | Active<br>/Talking<br>+5RT | Active<br>/Talking<br>+5RT | Active<br>/Talking<br>+5RT | Active<br>/Talking<br>+4RT | Active<br>/Talking<br>+5RT | Active<br>/Talking<br>+5RT | Active<br>/Talking<br>+5RT | Active<br>/Talking<br>+5RT | Active<br>/Talking<br>+5RT |  |
| 4   | Anxious<br>+2/3  | Agitated<br>+5    | Bright<br>+4T              | Active<br>+5R              | Relaxed<br>+4T/+5R         | Anxious<br>+5F/+4TR        | Alert<br>+5t               | Relaxed<br>+4R&T           | Wary<br>+3TR               | Active<br>+4TR             | Active<br>+4TR             | Passive<br>-2/+2TR         | Relaxed<br>+4TR            |  |
| 5   | Alert<br>-1R/+2T | Active<br>+2R/+3T | Passive<br>+3R/+4T         | Low<br>+3RT                | Anxious<br>+3R/+4T         | Anxious<br>+4R/+3T         | Low<br>+3R/+4T             | Anxious<br>+4RT            | Very Low<br>+3R/+4T        | Passive<br>+3R/+4T         | Passive<br>+3R/+4T         | Relaxed<br>+4R/+5T         | Anxious<br>+4RT            |  |
| 6   | Passive<br>+2    | Alert<br>+3       | Agitated<br>+2             | Alert<br>+2                | Passive<br>+2              | Talking<br>+3              | Alert<br>+3                | Passive<br>+1              | Alert<br>+2                | Alert<br>+4R               | Alert<br>+4R               | Passive<br>+4R             | Alert<br>+3FAMILY          |  |
| 7   | Passive<br>+2    | Alert<br>+3       | Alert<br>+2                | Alert<br>+4                | Passive<br>+1              | Alert<br>+4R               | Alert<br>+3                | Passive<br>+1              | Passive<br>+1              | Passive<br>+2              | Passive<br>+2              | Alert<br>+3                | Alert<br>+3                |  |
| 8   |                  |                   |                            |                            |                            |                            |                            |                            |                            |                            |                            |                            |                            |  |

R = RELATIVE

T = THERAPIST

F=FRIEND
